# Supplementary material for: FBXL16 Promotes Endometrial Progesterone Resistance via PP2AB55α/Cyclin D1 Axis in Ishikawa
Source: Hindawi journal article supplement (doi:10.1155/2022/7372202), 2022-09-05
Supplement: f1 [file 7372202.f1.pdf]

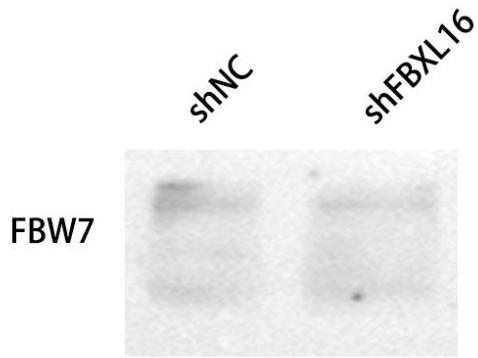

Figure S1. MPA IC<sub>50</sub> of Ishikawa cells determined by CCK-8 assays.

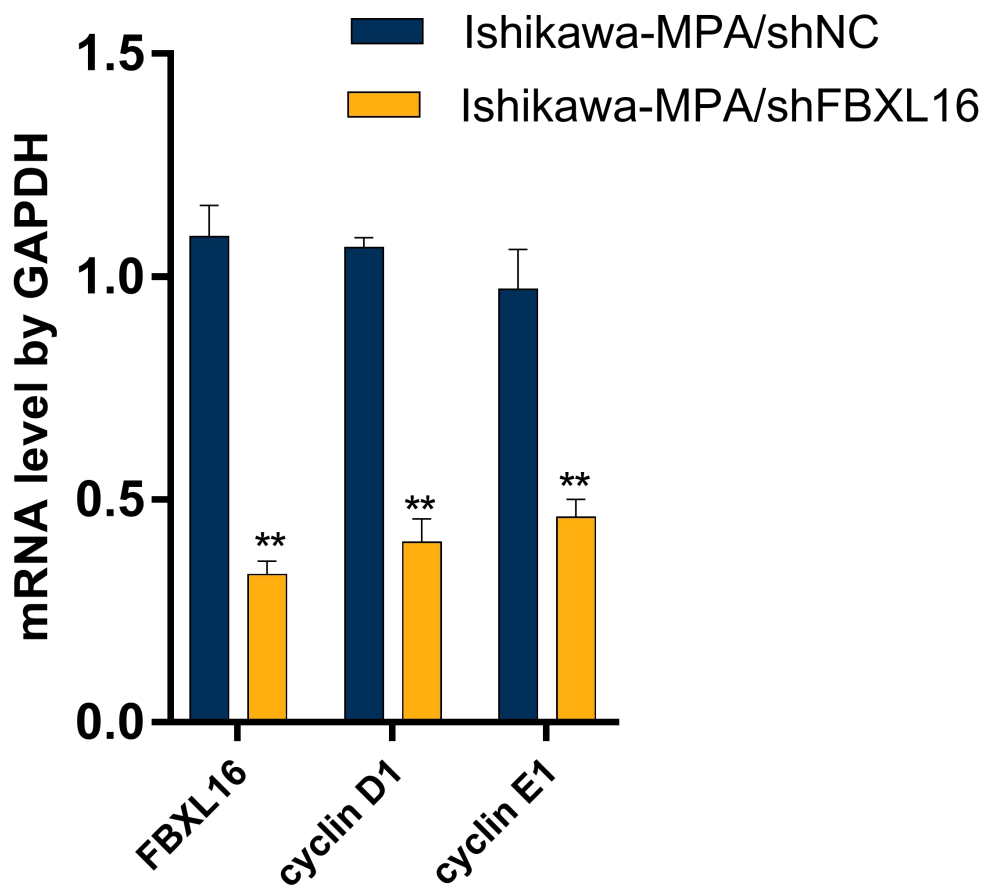

Figure S2-1. The cell growth curve of Ishikawa-MPA/shFBXL16 and Ishikawa-MPA/shNC cells by CCK-8 assays.

Figure S5. Primers of genes for qRT-PCR used in this study.

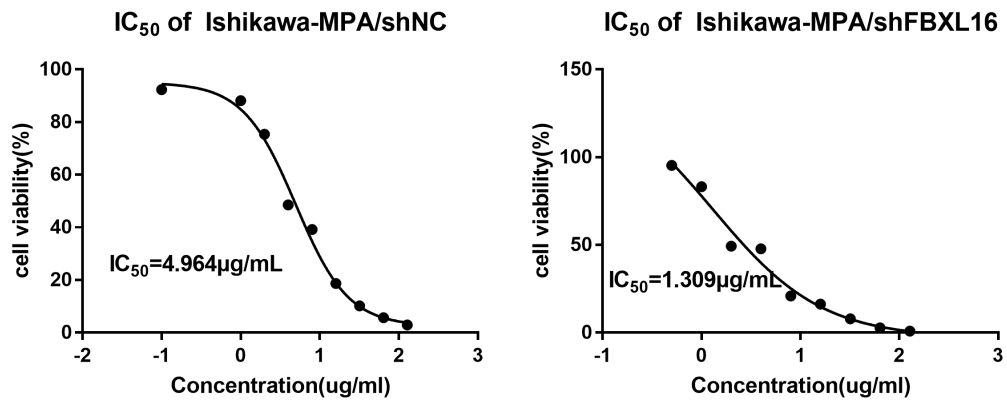

**Figure S2-2.** The IC<sub>50</sub> of MPA in Ishikawa-MPA/shFBXL16 and Ishikawa-MPA/shNC by CCK-8 method.

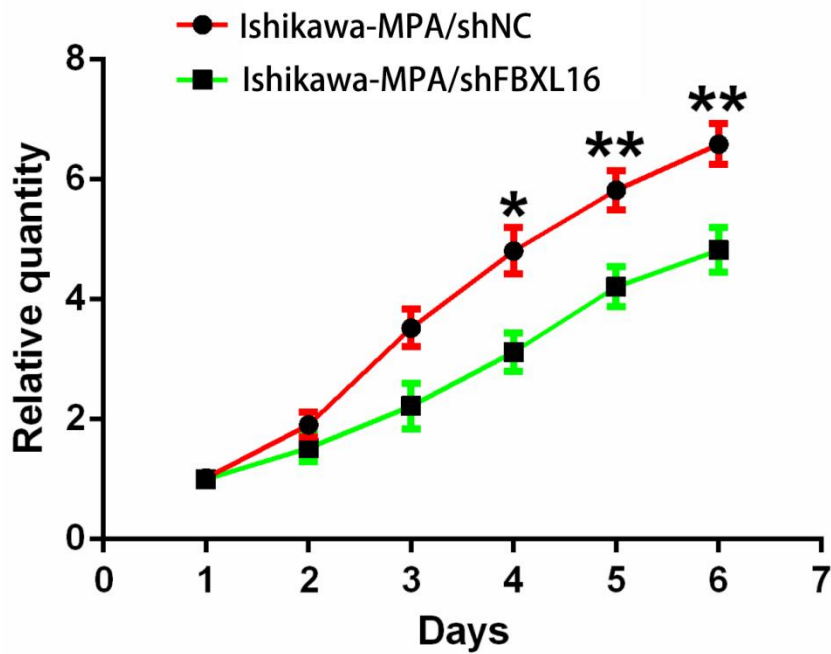

**Figure S3.** The mRNA level of FBXL16, cyclin D1 and cyclin E1 in Ishikawa-MPA/shFBXL16 and Ishikawa-MPA/shNC cells performed by real-time PCR.

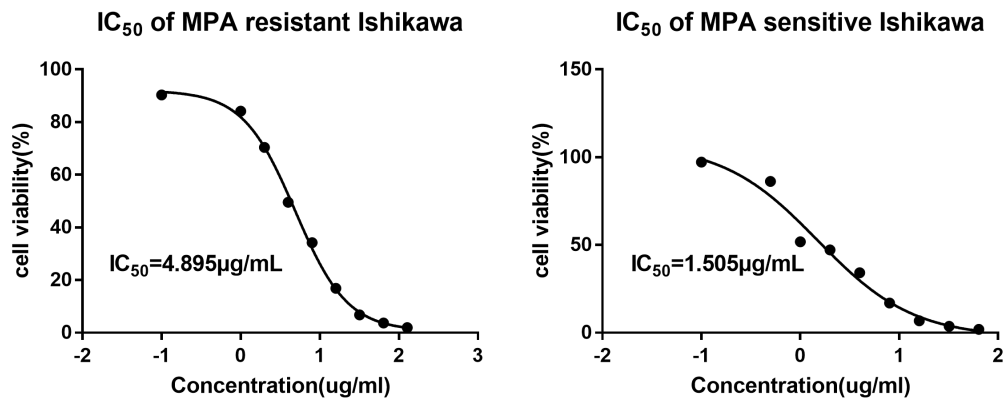

**Figure S4.** The protein expression of FBW7 in Ishikawa-MPA/shFBXL16 and Ishikawa-MPA/shNC cells by immunoprecipitation detection.

**Table S1 Primers for genes**

| Gene             | Sequence (5'->3') | Template strand       |
|------------------|-------------------|-----------------------|
| <b>FBXL16</b>    | Forward primer    | AGCGGCCTTATTTATCTGGGC |
|                  | Reverse primer    | GACATCTTCCTGGCAGCTC   |
| <b>cyclin D1</b> | Forward primer    | GATGCCAACCTCCTCAACGA  |
|                  | Reverse primer    | GGAAGCGGTCCAGGTAGTTC  |
| <b>cyclin E1</b> | Forward primer    | CCATCATGCCGAGGGAGC    |
|                  | Reverse primer    | TAATCCGAGGCTTGCACGTT  |
| <b>GAPDH</b>     | Forward primer    | GACAGTCAGCCGCATCTTCT  |
|                  | Reverse primer    | GCGCCAATACGACCAAATC   |
